# Supplementary material for: A DR/NIR Hybrid Polymeric Tool for Functional Bio-Coatings: Theoretical Study, Cytotoxicity, and Antimicrobial Activity
Source: MDPI journal article supplement (doi:10.3390/polym15040883), 2023-02-10
Supplement: s1 [file s1]

# A DR/NIR Hybrid Polymeric Tool for Functional Bio-Coatings: Theoretical Study, Cytotoxicity, and Antimicrobial Activity

Rosita Diana <sup>1</sup>, Francesco Silvio Gentile <sup>2</sup>, Simona Concilio <sup>2,3</sup>, Antonello Petrella <sup>2</sup>, Raffaella Belvedere <sup>2</sup>, Martina Schibeci <sup>4</sup>, Angela Arciello <sup>4,5</sup>, Luigi Di Costanzo <sup>1</sup> and Barbara Panunzi <sup>1,\*</sup>

<sup>1</sup> Department of Agricultural Sciences, University of Naples Federico II, 80055 Napoli, Italy

<sup>2</sup> Department of Pharmacy, University of Salerno, 84084 Salerno, Italy

<sup>3</sup> Bionam Research Center for Biomaterials, University of Salerno, 84084 Salerno, Italy

<sup>4</sup> Department of Chemical Sciences, University of Naples Federico II, 80126 Napoli, Italy

<sup>5</sup> Istituto Nazionale di Biostrutture e Biosistemi (INBB), 00136 Roma, Italy

\* Correspondence: barbara.panunzi@unina.it

## SUPPLEMENTARY MATERIAL

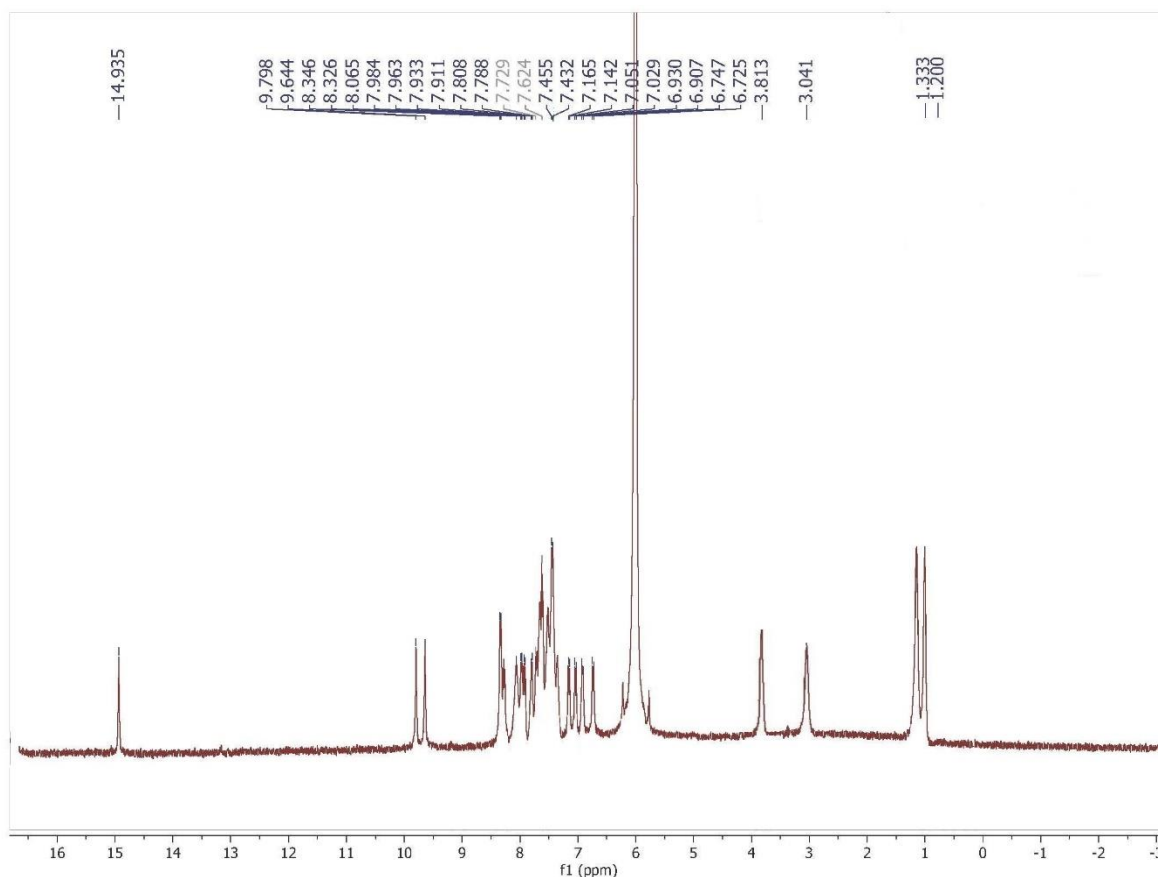

**Figure S1.** Hard copy <sup>1</sup>H NMR (500 MHz, TCE-d<sub>2</sub>, 25 °C, ppm) of ZnNB.

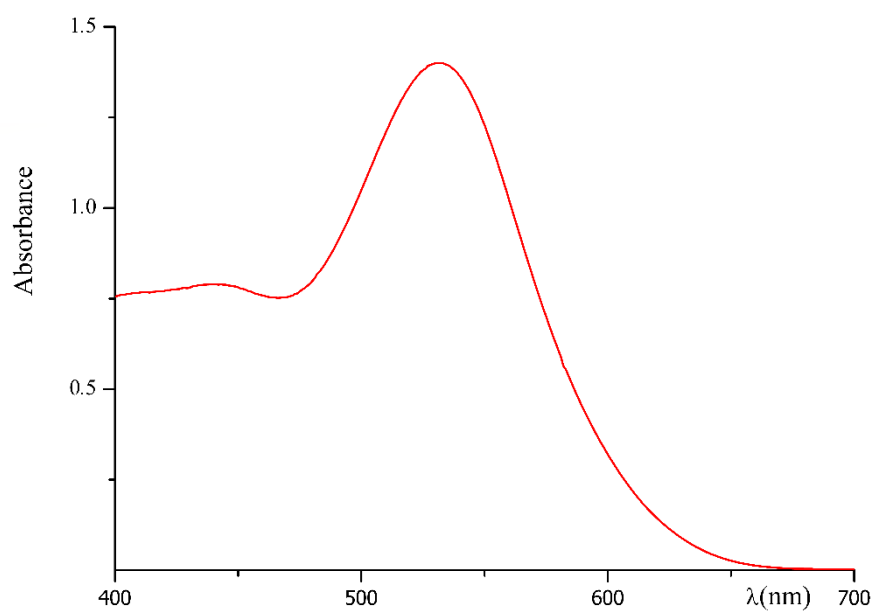

**Figure S2.** Absorbance spectrum of ZnNB deposited as powder crystals onto a quartz slide.

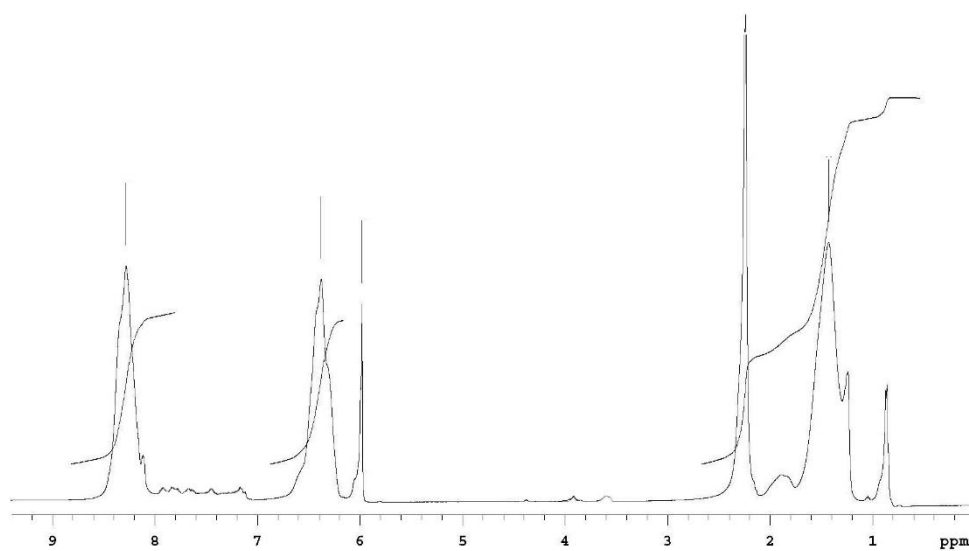

**Figure S3.** Hard copy  $^1\text{H}$  NMR (500 MHz, TCE- $d_2$ , 25  $^\circ\text{C}$ , ppm) of P4VP-ZnNB 20%.

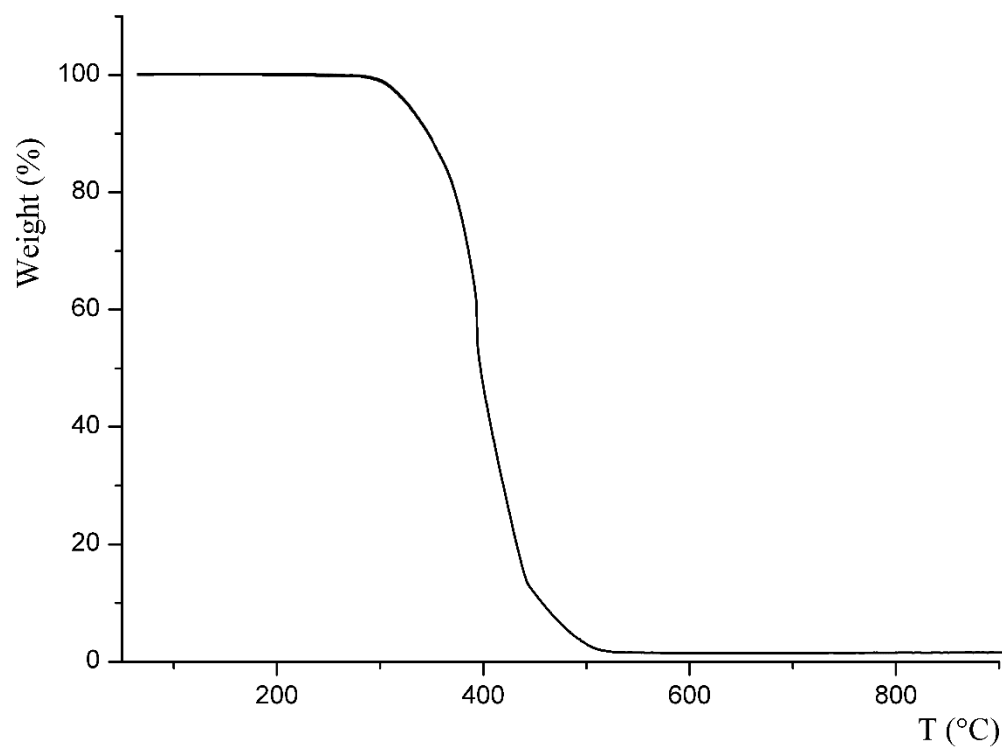

**Figure S4.** TGA curve of P4VP-ZnNB 20%.

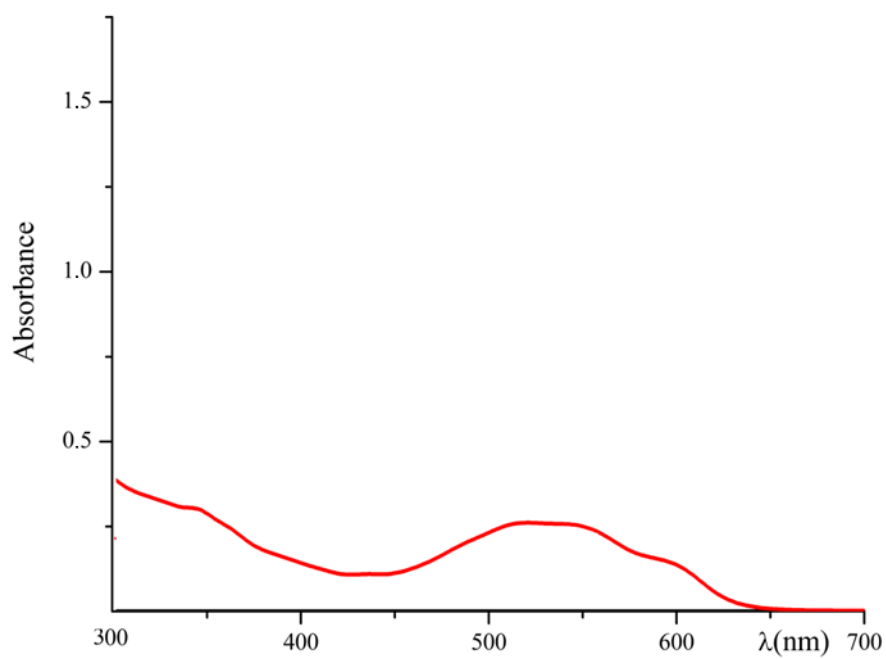

**Figure S5.** Absorbance spectrum of a thin transparent film P4VP-ZnNB 20% spin-coated onto a quartz slide.

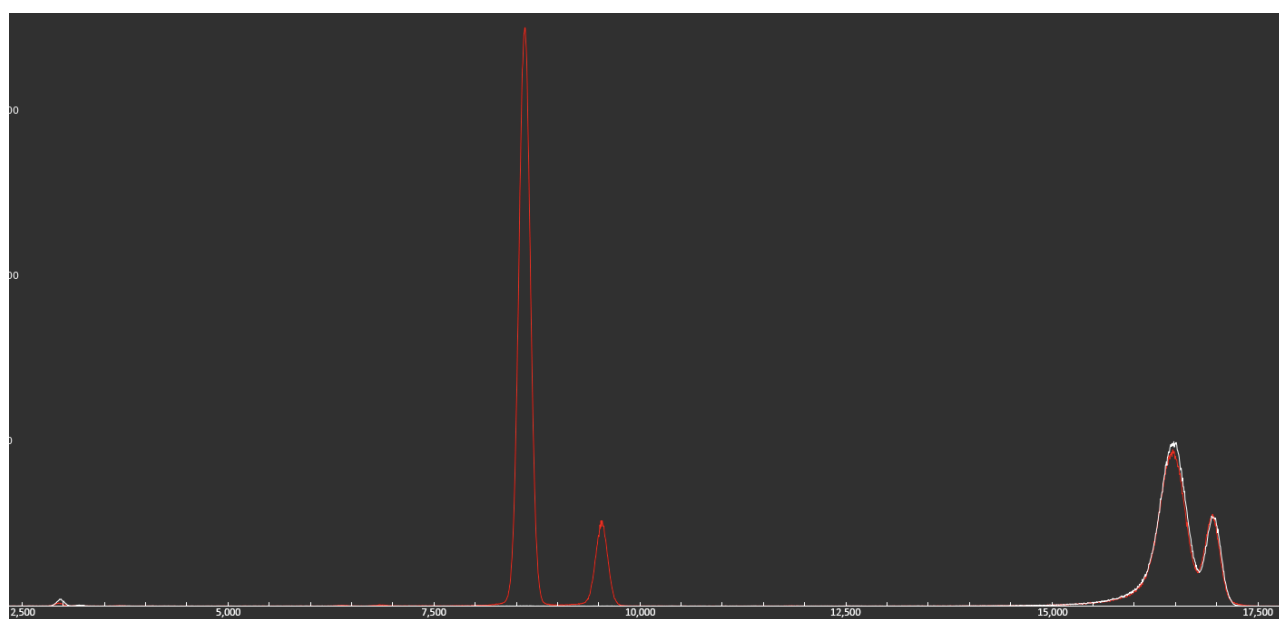

**Figure S6.** Energy spectrum obtained from X-ray fluorescence measurement of washed single crystal of ZnNB shows characteristic K edge (8.6 keV) and K peaks of zinc (red color). For comparison, the spectrum obtained for Kapton (shown in white color) is included. The material was used as support and a reference material.

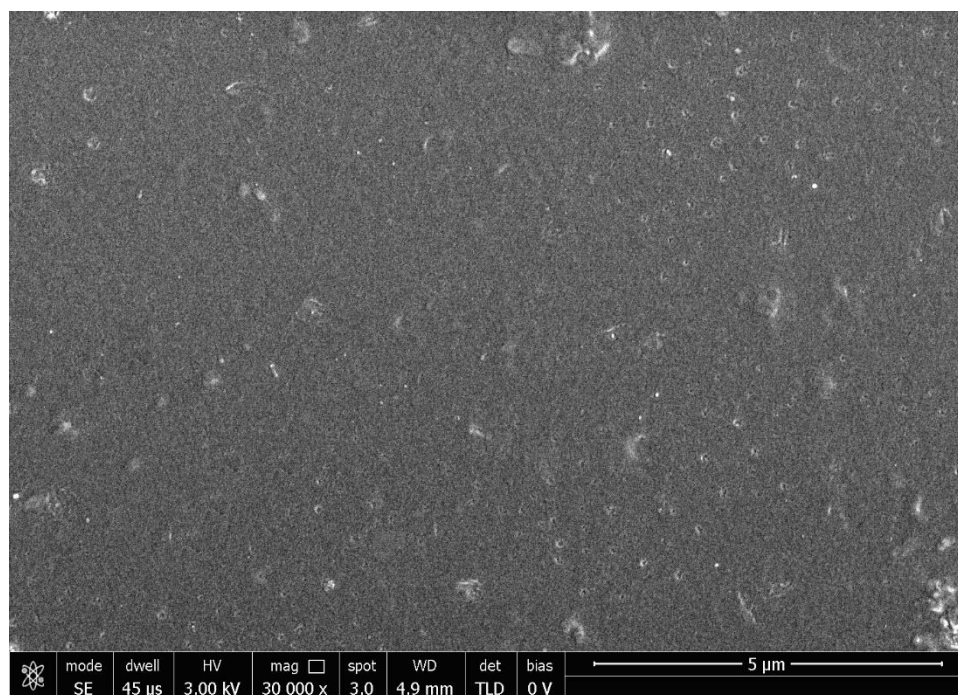

**Figure S7.** SEM micrographs of P4VP-ZnNB 20% film deposited onto quartz slide and metalized by gold sputtering (about 5 nm)

**Table S1.** Data collection statistics for crystals of ZnNB

| Color                  | Red                 |
|------------------------|---------------------|
| Temperature (K)        | 100                 |
| Wavelength (Å)         | 0.619               |
| Crystal system         | Monoclinic          |
| Space group            | $P 2_1/n$           |
| $a$ (Å)                | 16.442 (7)          |
| $b$ (Å)                | 4.790 (2)           |
| $c$ (Å)                | 25.880 (9)          |
| $\alpha$ (°)           | 90.00 (3)           |
| $\beta$ (°)            | 91.24 (11)          |
| $\gamma$ (°)           | 92.49 (3)           |
| Resolution (Å)         | 2.32–0.78           |
| R-merge                | 0.053               |
| I/s(I) (highest shell) | 14.14 (2.07)        |
| Completeness (%)       | 99.4                |
| Multiplicity           | 6.5 (5.5)           |
| Mosaicity (°)          | 0.281               |
| Volume                 | 5628 Å <sup>3</sup> |
| Z                      | 1                   |
